# Supplementary material for: Aspect ratio is associated with recanalization after coiling of unruptured intracranial aneurysms
Source: Research Square preprint supplement (doi:10.21203/rs.3.rs-959815/v1), 2021-10-11
Supplement: Supplementary file 1 [file 279c10a3a18f1cd5fb7ecca1.xlsx]

## Sheet: Table 1
	Table 1. Consensus Grading Scale for Endovascular Aneurysm Occlusion
	Grade		Definition
	0		Complete aneurysm occlusion
	1		90% or greater aneurysm occlusion
	2		70-89% aneurysm occlusion
	3		50-69% aneurysm occlusion
	4		25-49% aneurysm occlusion
	5		Less than 25% aneurysm occlusion

## Sheet: Table 2
	Table 2. Profiles of Patients and Aneurysms
	Patients characteristics
	Age, mean (yrs) ± SD			61.6 ± 11.4
	Female, n (%)			225 (73.3)
	Follow-up period, mean ± SD (range)			79.0 ± 39.8 (6-172)
	Aneurysms characteristics
	Maximum size, mean(mm) ± SD			7.0 ± 2.7
	Neck size, mean(mm) ± SD			4.0 ± 1.7
	Small neck (<4 mm), n (%)			144 (46.9)
	Wide neck (≧4 mm), n (%)			163 (53.1)
	Aspect ratio, mean ± SD			1.48 ± 0.59

## Sheet: Table 3
	Table 3. Aneurysm Location
	Location			Number (%)
	Anterior circulation			221 (72)
	Paraclinoid			106 (34.5)
	ICA-PCom			33 (10.7)
	ICA-AChA			5 (1.6)
	ACoA			54 (17.6)
	DACA			7 (2.3)
	MCA			2 (0.6)
	Other			14 (4.6)
	Posterior circulation			86 (28%)
	BA bifurcation			51 (16.6)
	BA-SCA			12 (3.9)
	VA-PICA			9 (2.9)
	Other			14 (4.6)
	Total			307
	※ICA: internal carotid artery, PCom: posterior communicating artery,
	AChA: anterior choroidal artery, BA: basilar artery, VA: vertebral artery
	SCA: superior cerebellar artery, PICA: posterior inferior cerebellar artery

## Sheet: Table 4
	total (n, %)	2 point				1 point					Worsen of grading scale		Table 4. The worsening grade and follow-up period of recanalization
		3 to 5	2 to 4	1 to 3	0 to 2	4 to 5	3 to 4	2 to 3	1 to 2	0 to 1	CGS grade
	41 (13.4)	-	-	1	2	-	-	1	29	8	〜 6 month	Follow-up period
	21 (6.8)	-	-	2	-	-	2	5	10	2	6〜12 month
	18 (5.9)	-	-	-	-	-	1	5	10	2	12〜24 month
	7 (2.3)	-	1	-	-	-	1	3	1	1	24 month 〜
	87 (28.3)	-	1 (0.3)	3 (1.0)	2 (0.7)	-	4 (1.3)	14 (4.6)	50 (16.3)	13 (4.2)	total (n, %)

## Sheet: Table 5
	※VER: volume embolization ratio	Complete Obliteration, n (%)	VER, mean ± SD	Aspect ratio, mean ± SD	Neck size, mean(mm) ± SD	Maximum size, mean(mm) ± SD	Male, n (%)	Age, mean (yrs) ± SD	n (%)			Table 5. Univariate Analysis for Risk factor of Aneurysm Recanalization
		12 (15.8)	25.6 ± 5.6	1.68 ± 0.66	4.8 ± 2.3	8.8 ± 3.7	20 (26.3)	60.2 ± 12.3	76 (24.8)	Recanalization (+)
		65 (28.1)	27.3 ± 6.3	1.42 ± 0.55	3.9 ± 1.3	6.5 ± 2.0	61 (26.5)	62.0 ± 11.1	231 (75.2)	Recanalization (-)
		0.031	0.01	0.004	0.001	< 0.001	0.972	0.255		p-value

## Sheet: Table 6
	Table 6. Multivariate Analysis for Risk factor of Aneurysm Recanalization
		Odds Ratio (95% CI)		p-value
	Maximum size	1.27 (0.94-1.73)		0.119
	neck size	1.21 (0.74-1.96)		0.444
	Aspect ratio	4.15 (1.57-11.00)		0.004
	VER	0.94 (0.90-0.99)		0.015
	Complete obliteration	0.83 (0.18-3.83)		0.814
	※VER: volume embolization ratio
